# Supplementary material
Source: HighWire-hosted journal article supplement (https://www.ghspjournal.org/highwire/filestream/1651/field_highwire_adjunct_files/1/GHSP-D-14-00034-Smith-Supplementary_Material-Checklists.docx)
Supplement: GHSP-D-14-00034-Smith-Supplementary_Material-Checklists.docx [file GHSP-D-14-00034-Smith-Supplementary_Material-Checklists.docx]

**APPENDIX 1. Independently Reviewed Documents Standardized Worksheet**

**Country:**

**Source of Data:**

**PE/E**

Severe PE: DBP>=110mmHg, > 20wks; prtnria >-3+:

Y:____; N:____;I____; pg#____

__________________________________________________________________

__________________________________________________________________

Del w/in 24hr of sx: Y:____; N:____;I____; pg#____

__________________________________________________________________

Eclampsia: Cnvlsn, Y:____; N:____;I____; pg#____

__________________________________________________________________

__________________________________________________________________

Del w/in 12hr of sx: Y:____; N:____;I____; pg#____

__________________________________________________________________

**PE/E Treatment**

Loading - MgS04

(1) 4g MgS04 IV (20mL 20%) ≥ 5min:

Y:____; N:____;I____; pg#____ __________________________________________________________________

__________________________________________________________________

(&) 10g MgS04 (10mL 50%) 5g q butt.:

Y:____; N:____;I____; pg#____

__________________________________________________________________

__________________________________________________________________

If unable IV – IM only: Y:____; N:____;I____; pg#____

__________________________________________________________________

__________________________________________________________________

If cnvl recur after 15min: 2g MgS04 IV:

Y:____; N:____;I____; pg#____

__________________________________________________________________

Loading – Diazepam

(1) Diazepam 10mg IV ≥ 2min: Y:____; N:____;I____; pg#____

__________________________________________________________________

__________________________________________________________________

If cnvl recur: repeat: Y:____; N:____;I____; pg#____

__________________________________________________________________

(OR) Diazepam 20mg in 10mL syringe rectally, hold together x 10min or via catheter:

Y:____; N:____;I____; pg#____

__________________________________________________________________

__________________________________________________________________

If cnvl recur: repeat: Y:____; N:____;I____; pg#____

__________________________________________________________________

Maintain – MgS04

5g 50% MgS04 IM q buttocks q4hrs

Y:____; N:____;I____; pg#____

__________________________________________________________________

__________________________________________________________________

Cont. MgS04 x24hrs or last cnvl:

Y:____; N:____;I____; pg#____

__________________________________________________________________

__________________________________________________________________

Before giving MgS04 check: DTR, UOP > 100mL/4hrs, RR >=16/min: Y:____; N:____;I____; pg#____

__________________________________________________________________

__________________________________________________________________

Maintain – Diazepam

Diazepam 40mg/500mL IV: Y:____; N:____;I____; pg#____

__________________________________________________________________

**Tx of** **HTN in PE/E**

Tx if DBP > 110mmHg: Y:____; N:____;I____; pg#____ __________________________________________________________________

Hydralazine is primary drug: Y:____; N:____;I____; pg#____

__________________________________________________________________

Give hydralazine 5mg IV (3-4min):

Y:____; N:____;I____; pg#____

__________________________________________________________________

__________________________________________________________________

If no IV, give 12.5mg IM q 2hrs: Y:____; N:____;I____; pg#____

__________________________________________________________________

__________________________________________________________________

Alternative

Nifedipine 5mg sublingual: Y:____; N:____;I____; pg#____

__________________________________________________________________

__________________________________________________________________

Other HTN tx: Y:____; N:____; pg#____

__________________________________________________________________

__________________________________________________________________

__________________________________________________________________

**AMTSL**

Give oxy 10 IU IM w/in 1min: Y:____; N:____;I____; pg#____

__________________________________________________________________

__________________________________________________________________

If no oxy, give ergo 0.2mg IM/IV slw:

Y:____; N:____;I____; pg#____

__________________________________________________________________

__________________________________________________________________

(OR) Miso 600mcg oral/SL: Y:____; N:____;I____; pg#____

__________________________________________________________________

__________________________________________________________________

CCT w/countertraction: Y:____; N:____;I____; pg#____

__________________________________________________________________

Aftr dlvry of plcnta Imd. Ut. mass. & chck q15 minx2 hrs: Y:____; N:____;I____; pg#____

__________________________________________________________________

**APPENDIX 2. Jointly Reviewed Documents Standardized Worksheet**

| **Topic:** | **Question/Responses:** | **Notes:** |
| --- | --- | --- |
| Country: |  |  |
| Source(s): |  |  |
| **PE/E Treatment** | |  |
| Loading - MgS04 | 4g MgS04 IV (20mL 20%) ≥ 5min:  Y:  N:  I:  pg#: |  |
| 10g MgS04 (10mL 50%) 5g q buttocks:  Y:  N:  I:  pg#: |  |
| Loading – Diazepam | Diazepam 10mg IV ≥ 2min:  Y:  N:  I:  pg#: |  |
| Maintain – MgS04 | 5g 50% MgS04 IM q buttocks q4hrs  Y:  N:  I:  pg#: |  |
| Maintain – Diazepam | Diazepam 40mg/500mL IV:  Y:  N:  I:  pg#: |  |
| **Treatment of** **HTN in PE/E** | |  |
| Medication(s) used | Medication:  Dose:  Route of Administration:  pg#: |  |
|  | Medication:  Dose:  Route of Administration:  pg#: |  |
|  | Medication:  Dose:  Route of Administration:  pg#: |  |
| **AMTSL** | |  |
| Components of AMTSL | Give oxy 10 IU IM w/in 1min:  Y:  N:  I:  pg#: |  |
|  | Guidelines for CCT:  Y:  N:  I:  pg#: |  |
|  | Immediate uterine massage:  Y:  N:  I:  pg#: |  |
| Misoprostol for prevention of PPH | Guidelines present?  Y:  N:  I:  pg#:  Dose:  Route of Administration: |  |
